# Supplementary material for: Setting Priorities for Optimizing Vascular Access Decision Making – An International Survey of Patients and Clinicians
Source: PubMed Central journal article supplement (PMC4494812; doi:10.1371/journal.pone.0128228), 2015-07-07
Supplement: pone.0128228.s003.pdf [file pone.0128228.s003.pdf]

**S3 File** – Mean adjusted ratings and ranks of all 42 vascular access topics included in the survey (reported per respondent group)

|                                                                                                                                                                                                    | KIDNEY PATIENTS |                                                  |      | CLINICIANS |                                                  |      |     |                                                  |      |     |                                                  |      |
|----------------------------------------------------------------------------------------------------------------------------------------------------------------------------------------------------|-----------------|--------------------------------------------------|------|------------|--------------------------------------------------|------|-----|--------------------------------------------------|------|-----|--------------------------------------------------|------|
|                                                                                                                                                                                                    |                 |                                                  |      |            | <i>Nephrologists</i>                             |      |     | <i>Nurses</i>                                    |      |     | <i>Surgeons and radiologists</i>                 |      |
| Topic                                                                                                                                                                                              | N               | Mean (SD)<br>rating <sub>adj</sub> <sup>a)</sup> | Rank | N          | Mean (SD)<br>rating <sub>adj</sub> <sup>a)</sup> | Rank | N   | Mean (SD)<br>rating <sub>adj</sub> <sup>a)</sup> | Rank | N   | Mean (SD)<br>rating <sub>adj</sub> <sup>a)</sup> | Rank |
| <b>Preservation of veins</b>                                                                                                                                                                       | 84              | 4.24 (0.51)                                      | 18   | 687        | <b>4.45 (0.36)</b>                               | 3    | 194 | <b>4.43 (0.33)</b>                               | 2    | 140 | <b>4.56 (0.34)</b>                               | 2    |
| <b>Timing of vascular access creation</b> (e.g., when to start talking about it with the patient, when to first assess the vessels, time of surgical referral)                                     | 84              | 4.21 (0.39)                                      | 26   | 687        | <b>4.39 (0.35)</b>                               | 7    | 194 | 4.24 (0.36)                                      | 22   | 140 | <b>4.38 (0.33)</b>                               | 9    |
| <b>Preoperative assessment of vessels</b> (e.g., general clinical evaluation, imaging techniques for vein mapping, cut off values for suitable vessels)                                            | 85              | 4.33 (0.40)                                      | 7    | 687        | 4.30 (0.38)                                      | 18   | 194 | 4.20 (0.41)                                      | 24   | 140 | <b>4.49 (0.34)</b>                               | 5    |
| <b>Patient involvement in preparing for access creation and type selection</b> (e.g., educational strategies, decision-making aids, psychosocial support)                                          | 85              | 4.25 (0.43)                                      | 17   | 687        | <b>4.05 (0.46)</b>                               | 32   | 194 | 4.17 (0.41) <sup>b)</sup>                        | 28   | 140 | 4.13 (0.43)                                      | 27   |
| <b>Selection of vascular access type</b> (e.g., tunneled catheter versus AV fistula versus AV graft, clinical and social (contra-)indications for specific access types, last resort access types) | 85              | 4.39 (0.29)                                      | 2    | 687        | <b>4.49 (0.31)</b>                               | 2    | 194 | 4.34 (0.37)                                      | 9    | 140 | <b>4.57 (0.24)</b>                               | 1    |
| <b>Selection of vascular access site</b> (e.g., upper versus lower limb for fistulas/grafts, internal jugular versus subclavian vein for catheters)                                                | 85              | 4.32 (0.36)                                      | 9    | 687        | 4.40 (0.35)                                      | 5    | 194 | 4.32 (0.36)                                      | 15   | 140 | <b>4.50 (0.27)</b>                               | 4    |
| <b>Surgical techniques for AV access creation</b> (e.g., selection of fistula or graft type, microsurgery, use of vessel dilators)                                                                 | 75              | 4.10 (0.43)                                      | 33   | 687        | <b>4.39 (0.35)</b>                               | 8    | 194 | 4.24 (0.43)                                      | 21   | 140 | <b>4.54 (0.28)</b>                               | 3    |
| <b>Selection of AV graft material</b> (e.g., synthetic versus autologous, hybrid grafts)                                                                                                           | 68              | 3.93 (0.59)                                      | 38   | 687        | 3.88 (0.51)                                      | 37   | 194 | 3.93 (0.55)                                      | 37   | 140 | <b>4.21 (0.54)</b>                               | 22   |
| <b>Timing of surgical procedure to create AV access</b> (i.e., when to create the access)                                                                                                          | 76              | 4.09 (0.54)                                      | 35   | 687        | <b>4.29 (0.39)</b>                               | 19   | 194 | 4.10 (0.44)                                      | 33   | 140 | 4.26 (0.36) <sup>b)</sup>                        | 20   |
| <b>Local regional versus general anesthesia</b>                                                                                                                                                    | 75              | 4.07 (0.49)                                      | 36   | 687        | <b>3.58 (0.53)</b>                               | 41   | 194 | <b>3.54 (0.59)</b>                               | 41   | 140 | <b>3.76 (0.54)</b>                               | 40   |
| <b>Prevention, diagnosis &amp; treatment of peri-operative fistula thrombosis</b> (i.e., during and shortly after surgery)                                                                         | 75              | 4.30 (0.37)                                      | 12   | 687        | 4.26 (0.36)                                      | 20   | 194 | 4.56 (0.28)                                      | 6    | 140 | 4.07 (0.40)                                      | 21   |
| <b>Prevention of peri-operative fistula/graft infections</b>                                                                                                                                       | 76              | 4.34 (0.34)                                      | 5    | 687        | 4.27 (0.41)                                      | 22   | 194 | 4.40 (0.33)                                      | 4    | 140 | <b>4.20 (0.46)</b>                               | 23   |
| <b>Defining &amp; assessing AV fistula maturation</b>                                                                                                                                              | 76              | 4.29 (0.33)                                      | 13   | 687        | 4.34 (0.33)                                      | 11   | 194 | 4.33 (0.33)                                      | 12   | 140 | 4.31 (0.33)                                      | 15   |
| <b>Prevention of poor AV fistula maturation</b> (e.g., indications for preemptive interventions, forearm or                                                                                        | 75              | 4.19 (0.33)                                      | 28   | 687        | <b>4.32 (0.36)</b>                               | 16   | 194 | <b>4.32 (0.31)</b>                               | 13   | 140 | 4.28 (0.34)                                      | 19   |

|                                                                                                                                                                                                                                                                    |    |             |    |     |                    |    |     |                    |    |     |                    |    |  |
|--------------------------------------------------------------------------------------------------------------------------------------------------------------------------------------------------------------------------------------------------------------------|----|-------------|----|-----|--------------------|----|-----|--------------------|----|-----|--------------------|----|--|
| upper limb exercise, obliteration of venous branches)                                                                                                                                                                                                              |    |             |    |     |                    |    |     |                    |    |     |                    |    |  |
| <b>Interventions for poor AV fistula maturation</b><br>(e.g., surgery, angiography)                                                                                                                                                                                | 74 | 4.25 (0.37) | 16 | 687 | 4.30 (0.38)        | 17 | 194 | 4.20 (0.41)        | 25 | 140 | 4.33 (0.38)        | 13 |  |
| <b>Timing of first cannulation</b>                                                                                                                                                                                                                                 | 76 | 4.17 (0.38) | 30 | 687 | 4.22 (0.38)        | 24 | 194 | 4.25 (0.39)        | 20 | 140 | 4.14 (0.37)        | 25 |  |
| <b>Selection of cannula type</b> (e.g., needle gauge, needle material, using smaller needles for first cannulation)                                                                                                                                                | 75 | 4.01 (0.48) | 37 | 687 | 3.98 (0.44)        | 35 | 194 | 4.10 (0.42)        | 32 | 140 | 3.89 (0.35)        | 36 |  |
| <b>Managing pain during cannulation</b>                                                                                                                                                                                                                            | 76 | 3.90 (0.65) | 40 | 687 | 3.79 (0.44)        | 39 | 194 | 4.06 (0.44)        | 34 | 140 | 3.81 (0.39)        | 38 |  |
| <b>Managing needle phobia</b>                                                                                                                                                                                                                                      | 76 | 3.69 (0.57) | 42 | 687 | 3.76 (0.47)        | 40 | 194 | <b>3.99 (0.47)</b> | 35 | 140 | 3.77 (0.43)        | 39 |  |
| <b>Cannulation procedure</b> (e.g., button hole versus rope ladder technique, needle orientation, use of imaging techniques, self-cannulation, avoiding needle dislodgment during dialysis, tourniquet use, needling of deep fistulas, puncture site surveillance) | 75 | 4.22 (0.48) | 25 | 687 | 4.13 (0.45)        | 28 | 194 | 4.27 (0.39)        | 18 | 140 | 4.11 (0.37)        | 29 |  |
| <b>Establishing hemostasis after cannulation</b><br>(e.g., use of hemostatic plaster, use of clamps, management of malpuncture incidents)                                                                                                                          | 76 | 4.11 (0.48) | 34 | 687 | 4.13 (0.40)        | 27 | 194 | 4.19 (0.42)        | 27 | 140 | 4.08 (0.38)        | 30 |  |
| <b>Surveillance of fistula/graft (dys)function</b><br>(e.g., methods, frequency, cut-off values for blood flow/venous pressure/recirculation)                                                                                                                      | 76 | 4.26 (0.30) | 14 | 687 | 4.34 (0.35)        | 12 | 194 | 4.33 (0.34)        | 10 | 140 | 4.33 (0.35)        | 12 |  |
| <b>Prevention, diagnosis &amp; treatment of fistula/graft stenosis</b> (e.g., preemptive invasive interventions, interventional radiology, timing of interventions)                                                                                                | 76 | 4.23 (0.35) | 20 | 687 | <b>4.37 (0.34)</b> | 9  | 194 | <b>4.36 (0.29)</b> | 8  | 140 | <b>4.38 (0.34)</b> | 10 |  |
| <b>Prevention, diagnosis &amp; treatment of fistula/graft thrombosis</b> (e.g., oral anticoagulants, effect of medication (ESAs, statins) on thrombosis risk, preemptive invasive interventions, thrombectomy, timing of interventions)                            | 76 | 4.31 (0.34) | 11 | 687 | 4.36 (0.34)        | 10 | 194 | 4.40 (0.27)        | 5  | 140 | 4.37 (0.35)        | 11 |  |
| <b>Prevention &amp; diagnosis of fistula/graft infection</b><br>(e.g., aseptic techniques before cannulation, prophylactic antibiotics)                                                                                                                            | 76 | 4.35 (0.36) | 6  | 687 | 4.40 (0.33)        | 4  | 194 | 4.41 (0.29)        | 3  | 140 | 4.31 (0.32)        | 16 |  |
| <b>Prevention, diagnosis &amp; treatment of perigraft seromas</b> <sup>c)</sup>                                                                                                                                                                                    | 46 | 4.25 (0.38) | 19 | 268 | <b>3.54 (0.61)</b> | 42 | 87  | <b>3.53 (0.75)</b> | 42 | 70  | <b>3.58 (0.55)</b> | 42 |  |
| <b>Prevention &amp; treatment of AV access related heart disease</b>                                                                                                                                                                                               | 71 | 4.33 (0.40) | 8  | 687 | <b>4.11 (0.41)</b> | 29 | 194 | <b>4.15 (0.37)</b> | 30 | 140 | <b>3.99 (0.40)</b> | 35 |  |
| <b>Diagnosis &amp; treatment in case of atypical arm/hand pain</b> <sup>c)</sup>                                                                                                                                                                                   | 46 | 4.26 (0.42) | 15 | 268 | <b>4.01 (0.49)</b> | 33 | 87  | <b>3.83 (0.61)</b> | 40 | 70  | 4.08 (0.55)        | 31 |  |
| <b>Prevention &amp; treatment of limb ischemia</b> (e.g., diagnosis/treatment of steal syndrome)                                                                                                                                                                   | 74 | 4.24 (0.39) | 21 | 687 | 4.32 (0.34)        | 15 | 194 | 4.19 (0.36)        | 26 | 140 | 4.32 (0.31)        | 14 |  |
| <b>Prevention &amp; treatment of aneurysms</b>                                                                                                                                                                                                                     | 76 | 4.16 (0.41) | 31 | 687 | 4.10 (0.37)        | 30 | 194 | 4.15 (0.40)        | 29 | 140 | 4.13 (0.37)        | 26 |  |

|                                                                                                                                                                                                                                                        |    |             |    |  |     |                    |    |  |     |             |    |  |     |                           |    |
|--------------------------------------------------------------------------------------------------------------------------------------------------------------------------------------------------------------------------------------------------------|----|-------------|----|--|-----|--------------------|----|--|-----|-------------|----|--|-----|---------------------------|----|
| <b>Prevention &amp; treatment of carpal tunnel syndrome</b>                                                                                                                                                                                            | 74 | 3.90 (0.44) | 39 |  | 687 | 3.84 (0.42)        | 38 |  | 194 | 3.94 (0.46) | 36 |  | 140 | <b>3.70 (0.49)</b>        | 41 |
| <b>Selection of catheter type, material, and site</b> (e.g., coating, antegrade/retrograde tunneling, single/double lumen)                                                                                                                             | 9  | 4.14 (0.56) | 32 |  | 687 | 3.99 (0.43)        | 34 |  | 194 | 3.85 (0.51) | 39 |  | 140 | 3.89 (0.42)               | 37 |
| <b>Catheter insertion methods</b> (e.g., ultrasound guided versus anatomic landmarks)                                                                                                                                                                  | 9  | 3.82 (0.52) | 41 |  | 687 | 4.08 (0.48)        | 31 |  | 194 | 3.91 (0.54) | 38 |  | 140 | 4.07 (0.45)               | 32 |
| <b>Verification of catheter tip position</b>                                                                                                                                                                                                           | 9  | 4.23 (0.37) | 22 |  | 687 | 4.22 (0.41)        | 25 |  | 194 | 4.28 (0.38) | 17 |  | 140 | 4.15 (0.42)               | 24 |
| <b>Surveillance of catheter (dys)function</b> (e.g., methods, frequency, cut-off values for blood flow, long-term surveillance)                                                                                                                        | 9  | 4.20 (0.28) | 27 |  | 687 | 4.18 (0.38)        | 26 |  | 194 | 4.25 (0.38) | 19 |  | 140 | 4.00 (0.40)               | 33 |
| <b>Prevention, diagnosis &amp; treatment of catheter thrombosis</b> (e.g., anticoagulants, lock solutions, catheter exchange, timing of interventions)                                                                                                 | 9  | 4.47 (0.33) | 1  |  | 687 | 4.33 (0.33)        | 14 |  | 194 | 4.33 (0.33) | 11 |  | 140 | 4.12 (0.37) <sup>b)</sup> | 28 |
| <b>Prevention &amp; diagnosis of catheter infections</b> (e.g., (dis)connection techniques, exit site care, taking showers, lock solutions, (timing of) catheter exchange)                                                                             | 9  | 4.36 (0.19) | 4  |  | 687 | 4.53 (0.27)        | 1  |  | 194 | 4.49 (0.27) | 1  |  | 140 | 4.30 (0.37)               | 18 |
| <b>Prevention and treatment of central vein obstruction</b>                                                                                                                                                                                            | 9  | 4.22 (0.26) | 24 |  | 687 | 4.40 (0.31)        | 6  |  | 194 | 4.36 (0.29) | 7  |  | 140 | 4.41 (0.32)               | 7  |
| <b>Training, certification &amp; monitoring of skills/expertise of health care professionals in creation and maintenance</b> (e.g., who should be trained for what, educational strategies, minimum requirements for number of procedures per surgeon) | 85 | 4.37 (0.41) | 3  |  | 687 | 4.34 (0.34)        | 13 |  | 194 | 4.32 (0.34) | 14 |  | 140 | 4.41 (0.36)               | 8  |
| <b>Strategies to organize vascular access care</b> (e.g., who should create fistulas, multidisciplinary teams, vascular access coordinators, care pathways, dedicated surgical resources, specialized vascular access centres)                         | 85 | 4.31 (0.37) | 10 |  | 687 | 4.28 (0.37)        | 21 |  | 194 | 4.31 (0.35) | 16 |  | 140 | 4.42 (0.34)               | 6  |
| <b>Involvement of patient and family in access maintenance<sup>c)</sup></b> (e.g., promoting self-management, educational programmes, decision-making aids)                                                                                            | 50 | 4.23 (0.44) | 23 |  | 268 | <b>3.98 (0.56)</b> | 36 |  | 87  | 4.10 (0.59) | 31 |  | 70  | 4.00 (0.56)               | 34 |
| <b>Monitoring &amp; improving quality of vascular access care</b> (e.g., performance feedback, quality audits, financial incentives, meaningful performance indicators)                                                                                | 85 | 4.20 (0.38) | 29 |  | 687 | 4.22 (0.38)        | 23 |  | 194 | 4.22 (0.42) | 23 |  | 140 | 4.31 (0.36)               | 17 |

Abbreviations: AV, arteriovenous; N, number of respondents who rated the importance of a topic; SD, standard deviation

a) Values in bold indicate that the rating significantly differed from the rating assigned by patients ( $P < 0.01$ ).

b) Difference with patient rating was borderline significant ( $P$  between 0.010 and 0.014)

c) Topic was included in the survey based on suggestions by clinicians and patients in Phase 1. Data on rating were collected in Phase 2.
